# Supplementary material
Source: PubMed Central journal article supplement (PMC3791887)
Supplement: NIHMS513096-supplement-fig_s1.pdf [file NIHMS513096-supplement-fig_s1.pdf]

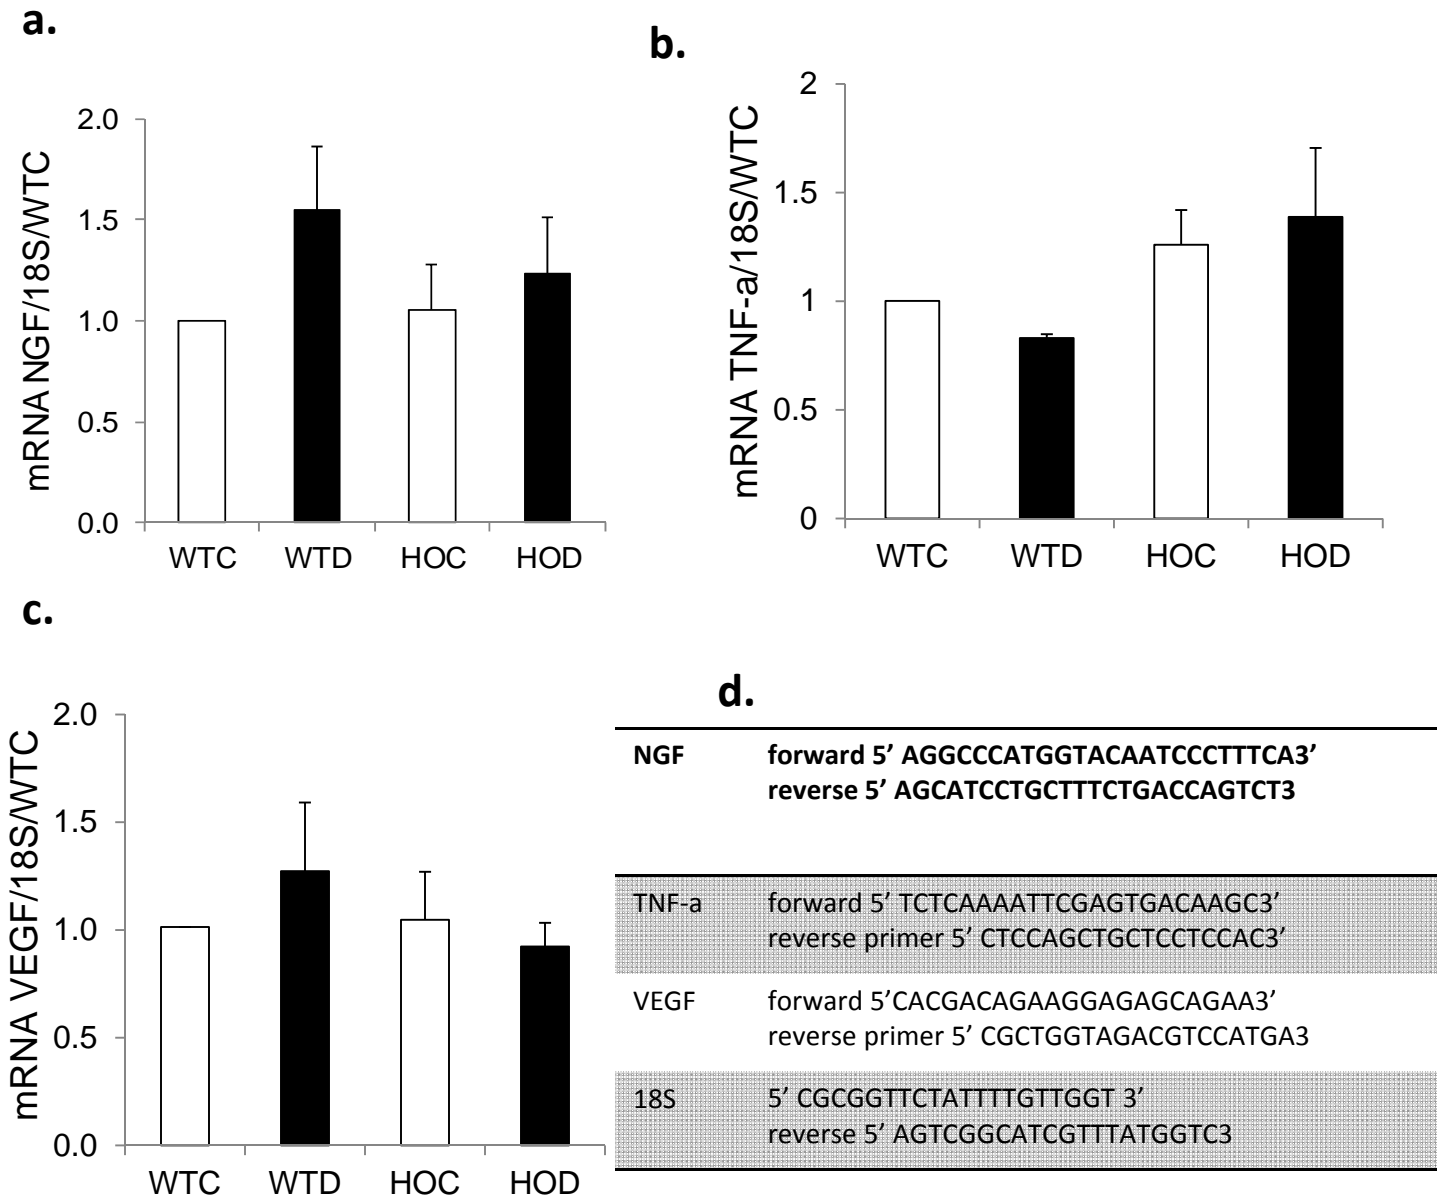

Supplementary figure.1 Statistical analysis of mRNA levels detected by Real-time PCR in retinas from various mice groups. a. Diabetes induced 1.5-fold increase in NGF mRNA in WTD retinas compared to WTC but there was no effect on HOC or HOD. b. There was no significant effect on expression level of TNF-a. c. Diabetes induced 1.27-fold increase in VEGF mRNA in WTD compared to WTC but no effect on HOC or HOD. d. List of primers used for realtime pCR assays.
