# Supplementary material
Source: PubMed Central journal article supplement (PMC3791887)
Supplement: NIHMS513096-supplement-fig_s2.pdf [file NIHMS513096-supplement-fig_s2.pdf]

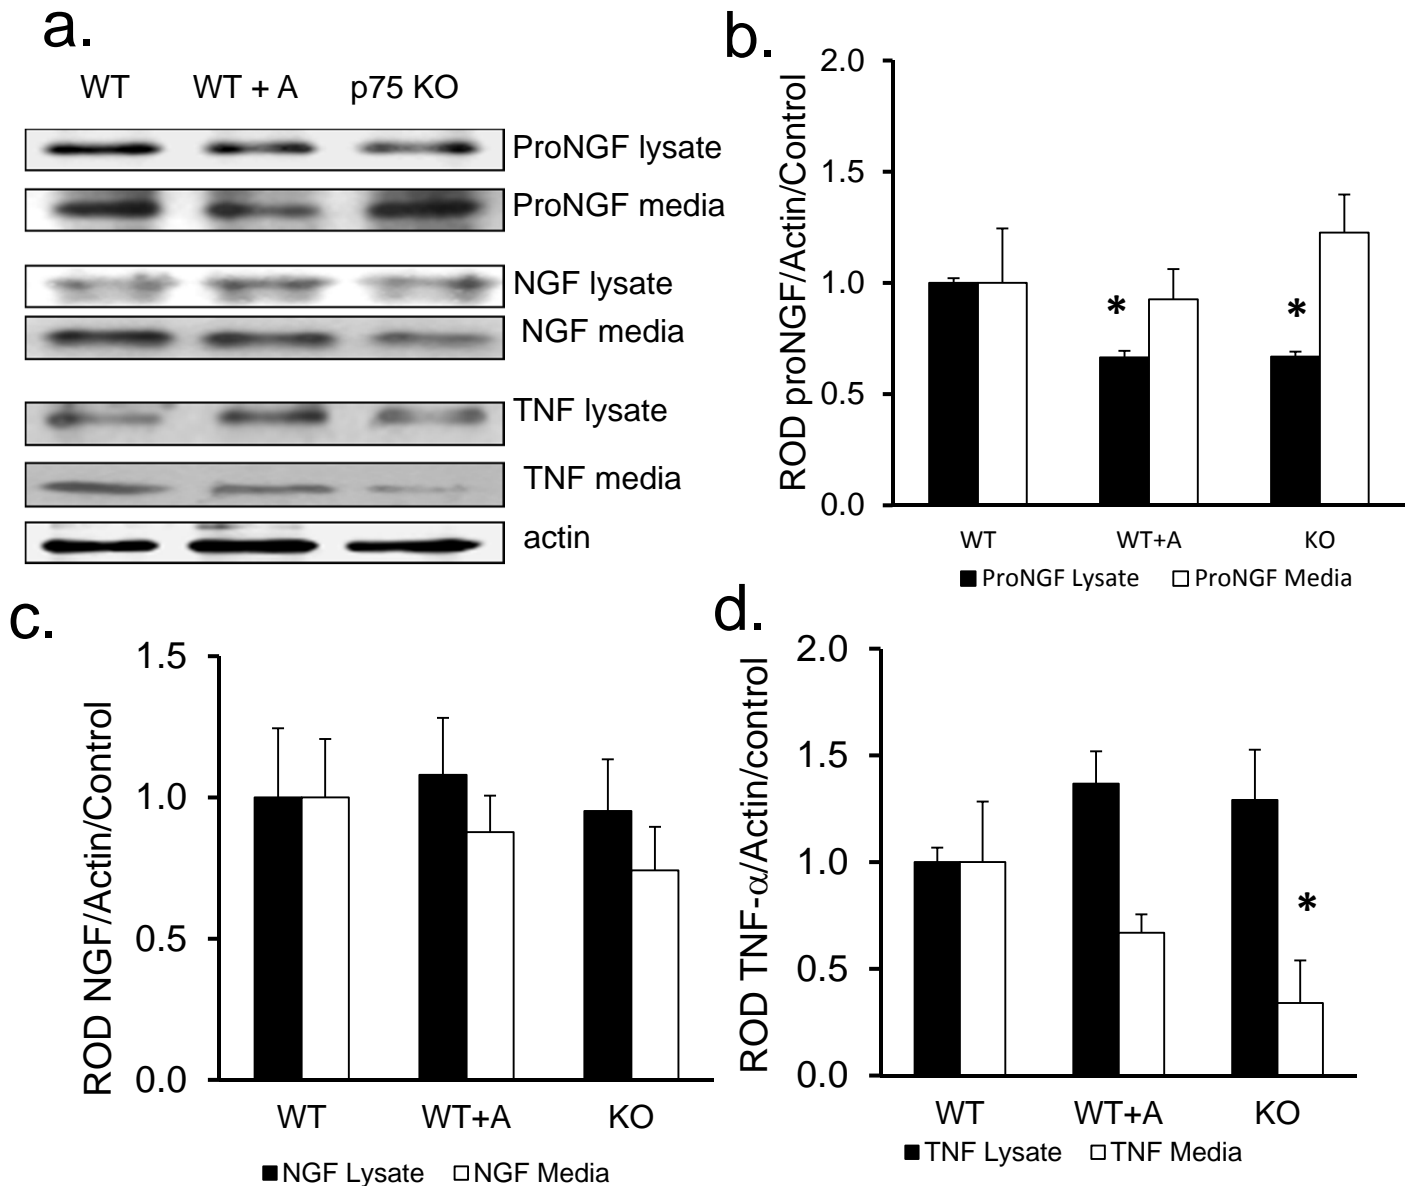

Supplementary figure.2 Effect of extended blockade of p75<sup>NTR</sup> using receptor antagonist (A) for 6-days in WT Müller cells compared to untreated WT or p75KO Müller cells. a. Representative images of proNGF, NGF and TNF- $\alpha$  protein levels assessed by Western blot analysis in both lysate (normalized to actin) and media. b. Deletion or antagonizing p75<sup>NTR</sup> significantly decreased expression of proNGF in cell lysate while p75KO tended to increase its release into media. c. There was no significant effect on expression level of NGF in cell lysate or its release in media among various groups. d. Deletion or antagonizing p75<sup>NTR</sup> increased expression of membrane-bound TNF- $\alpha$  (26 kDa), but decreased release of TNF- $\alpha$  into media. \* $p < 0.05$  when compared to WT,  $n = 3$ .
